# Supplementary material
Source: PubMed Central journal article supplement (PMC3656769)
Supplement: bi4000063_si_001.pdf [file bi4000063_si_001.pdf]

**Supplemental Table 1.** List of primers used for generating Asn mutants

| Mutants |         | Primer Sequence                                |
|---------|---------|------------------------------------------------|
| N240A   | Forward | 5' - CAGCGCCATCGGCGCCGTCACGGGAGAG - 3'         |
|         | Reverse | 5' - CTCTCCCGTGACGGCGCCGATGGCGCTG - 3'         |
| N339A   | Forward | 5' - CTGGCTTCCTTCCTTCGCTCAAACCCAGTTCCTC - 3'   |
|         | Reverse | 5' - GAGGGAAGTGGGTTTGAGCGAAGGAAGGGAAGCCAG - 3' |
| N540A   | Forward | 5' - CAGGTGGATTCTCCCGCCACAGTGGGCAGAC - 3'      |
|         | Reverse | 5' - GTCTGCCCACTGTGGGCGGGAGAATCCACCTG - 3'     |
| N554A   | Forward | 5' - CAGGTGGTGTTACCGCTCCCAGCTGGGATGC - 3'      |
|         | Reverse | 5' - GCATCCCAGCTGGGAGCGGTGAACACCACCTG - 3'     |
| N754A   | Forward | 5' - GCTGCTGCGCTCCGCCAGCTCCGGGACC - 3'         |
|         | Reverse | 5' - GGTCCCGGAGCTGGCGGAGCGCAGCAGC - 3'         |
